# Supplementary material
Source: PubMed Central journal article supplement (PMC4609529)
Supplement: NIHMS607465-supplement-01.pdf [file NIHMS607465-supplement-01.pdf]

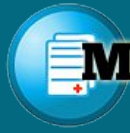

**CD 54 - Male**

|                           |                                  |                             |                  |
|---------------------------|----------------------------------|-----------------------------|------------------|
| <b>Date</b><br>11/17/2013 | <b>Height</b><br>5 feet 6 inches | <b>Weight</b><br>192 pounds | <b>BMI</b><br>31 |
|---------------------------|----------------------------------|-----------------------------|------------------|

### YOUR Health Behaviors and Mental Health

|                                 | Recommended Score     | Your Score               | Level of Concern | Ready to Change? | Want to Discuss? |
|---------------------------------|-----------------------|--------------------------|------------------|------------------|------------------|
| <b>Overall Health Rating</b>    | Good to Excellent     | <b>Good</b>              | No Concern       |                  |                  |
| <b>Body Mass Index</b>          | 20-25                 | <b>31</b>                | <b>A Lot</b>     | ✓★               | ✓                |
| <b>Health Behaviors</b>         |                       |                          |                  |                  |                  |
| Fruit/Vegetable Intake          | 5+/day                | <b>Less than 2/day</b>   | <b>A Lot</b>     | ✓                |                  |
| Fast Food Intake                | Less than 1 time/week | <b>4+ times/week</b>     | <b>A Lot</b>     | ✓                |                  |
| Soda/Sugary Beverage Intake     | Less than 1/day       | <b>3+/day</b>            | <b>A Lot</b>     |                  |                  |
| Physical Activity Participation | 150+ minutes/week     | <b>15 minutes/week</b>   | <b>A Lot</b>     |                  |                  |
| Sleep                           | Never/rarely sleepy   | <b>Rarely sleepy</b>     | No Concern       |                  |                  |
| Alcohol Intake                  | Never                 | <b>1 to 3 times</b>      | <b>A Lot</b>     |                  | ✓                |
| Tobacco use                     | No                    | <b>No</b>                | No Concern       |                  |                  |
| Illegal Drug/Prescription Use   | Never misuse          | <b>Never misused</b>     | No Concern       |                  |                  |
| <b>Mental Health</b>            |                       |                          |                  |                  |                  |
| Stress                          | Less than 5           | <b>9</b>                 | <b>A Lot</b>     | ✓                | ✓                |
| Anxiety/Worry                   | Not at all/rarely     | <b>Nearly every day</b>  | <b>A Lot</b>     | ✓                | ✓                |
| Depression                      | Not at all/rarely     | <b>Not at all/rarely</b> | No Concern       |                  |                  |

★ = Most important to you

#### Keep up the GOOD Work!

- You said there are few days you feel down, depressed, hopeless or have little interest or pleasure.
- You have few sleep problems.
- You don't use tobacco.
- You do not use illegal drugs or prescription medications for non-prescribed reasons.

#### Recommendations to Improve Your Health

##### Medium Priority

##### High Priority

- Obesity can lead to a number of health problems. Increase physical activity and/or limit the unhealthy food you eat to reduce your weight.
- Decrease your fast food meals or snacks to less than one per week.
- Increase fruits and vegetables to 5 or more servings per day.
- Decrease your soda or sugary beverage consumption to less than 1 per day.
- Increase your physical activity with the goal of being active for 150 minutes total per week.
- You reported feeling stressed often. Discuss ways to reduce your stress.
- You said that you feel nervous, anxious, on edge or unable to stop or control worrying nearly every day. Discuss your anxiety.
- Your answers suggest you drink too much alcohol which is bad for your health. You should not drink more than 4-5 drinks in one day.

Notes/Things to Discuss During My Appointment

---

---

---

---

---

---

---

---

---

---

Health Goals

The best goals are those that are **specific, measurable, achievable, realistic, and timely** and focus on the **who, what, where, when and how** you will achieve them. List 1 to 3 goals that you want to try to improve.

**Example Goal:**

*What will you do?* Decrease fast food by eating out 2-3 less times per week.  
*How will you do it?* Pack a lunch to bring to work 2 times per week and cook dinner one more time a week.  
*By when?* Gradually, over the next 3 weeks by decreasing fast food meals by one per week until I reach 3.

**Goal #1:**

*What will you do?* \_\_\_\_\_  
*How will you do it?* \_\_\_\_\_  
*By when?* \_\_\_\_\_

**Goal #2:**

*What will you do?* \_\_\_\_\_  
*How will you do it?* \_\_\_\_\_  
*By when?* \_\_\_\_\_

**Goal #3:**

*What will you do?* \_\_\_\_\_  
*How will you do it?* \_\_\_\_\_  
*By when?* \_\_\_\_\_

Follow-up Plan

**When:**

**How:**
