# Supplementary material
Source: PubMed Central journal article supplement (PMC4609529)
Supplement: NIHMS607465-supplement-02.pdf [file NIHMS607465-supplement-02.pdf]

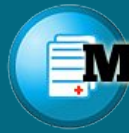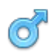

CD 54 - Male

Visit Date  
11/17/2013

Height  
5 ft. 6 in.

Weight  
192 pounds

BMI  
31

### Patient's Assessment Results

|                                  | Patient's Score   | Level of Concern | Ready to Change? |
|----------------------------------|-------------------|------------------|------------------|
| <b>Overall Health Rating</b>     | Good              |                  |                  |
| <b>Body Mass Index</b>           | 31                | H                | ✓★               |
| <b>Health Behaviors</b>          |                   |                  |                  |
| Fruit/Vegetable Intake           | Less than 2/day   | H                | ✓                |
| Fast Food Intake                 | 4+ times/week     | H                | ✓                |
| Soda/Sugary Beverage Intake      | 3+/day            | H                |                  |
| Physical Activity Participation  | 15 minutes/week   | H                |                  |
| Sleep                            | Rarely sleepy     |                  |                  |
| Alcohol Intake                   | 1 to 3 times      | H                |                  |
| <b>AUDIT-C Assessment Score</b>  | 7                 |                  |                  |
| Tobacco use                      | No                |                  |                  |
| Illegal Drug/Prescription Use    | Never misused     |                  |                  |
| <b>Mental Health</b>             |                   |                  |                  |
| Stress (0 to 10; none to severe) | 9                 | H                | ✓                |
| Anxiety/Worry                    | Nearly every day  | H                | ✓                |
| <b>GAD7 Assessment Score</b>     | 15                |                  |                  |
| Depression                       | Not at all/rarely |                  |                  |

H = High concern M = Medium concern

★ = Most important to patient

#### Patient Reports Interest in Discussing

- BMI
- Fruits/Vegetables Intake
- Alcohol Intake
- Stress
- Anxiety/Worry

#### Recommendations Patient Received

##### High Priority

- Obesity can lead to a number of health problems. Increase physical activity and/or limit the unhealthy food you eat to reduce your weight.
- Decrease your fast food meals or snacks to less than one per week.
- Increase fruits and vegetables to 5 or more servings per day.
- Decrease your soda or sugary beverage consumption to less than 1 per day.
- Increase your physical activity with the goal of being active for 150 minutes total per week.
- You reported feeling stressed often. Discuss ways to reduce your stress.
- You said that you feel nervous, anxious, on edge or unable to stop or control worrying nearly every day. Discuss your anxiety.
- Your answers suggest you drink too much alcohol which is bad for your health. You should not drink more than 4-5 drinks in one day.

#### Additional Notes:

### Responses to Follow-up Questions

#### AUDIT-C Assessment Questions

How many times in the **past year** have you had 4-5 or more drinks in a day? 1-3 times

- How often do you have a drink containing alcohol? 2-4 times a month
- How many standard drinks containing alcohol do you have on a typical day? 3 or 4
- How often do you have six or more drinks on one occasion? Less than monthly

#### GAD7 Questions

- Feeling nervous, anxious, or on edge Nearly every day
- Not being able to stop or control worrying More days than not
- Worrying too much about different things
  - Trouble relaxing More days than not
  - Being restless that it's hard to sit still More days than not
  - Becoming easily annoyed or irritable Over half the days
  - Feeling afraid as if something awful might happen Several days
